# Supplementary figures and images for: Mental health literacy and attitudes in a Swedish community sample – Investigating the role of personal experience of mental health care
Source: Springer Nature journal article supplement (doi:10.1186/1471-2458-8-8), 2008-01-09

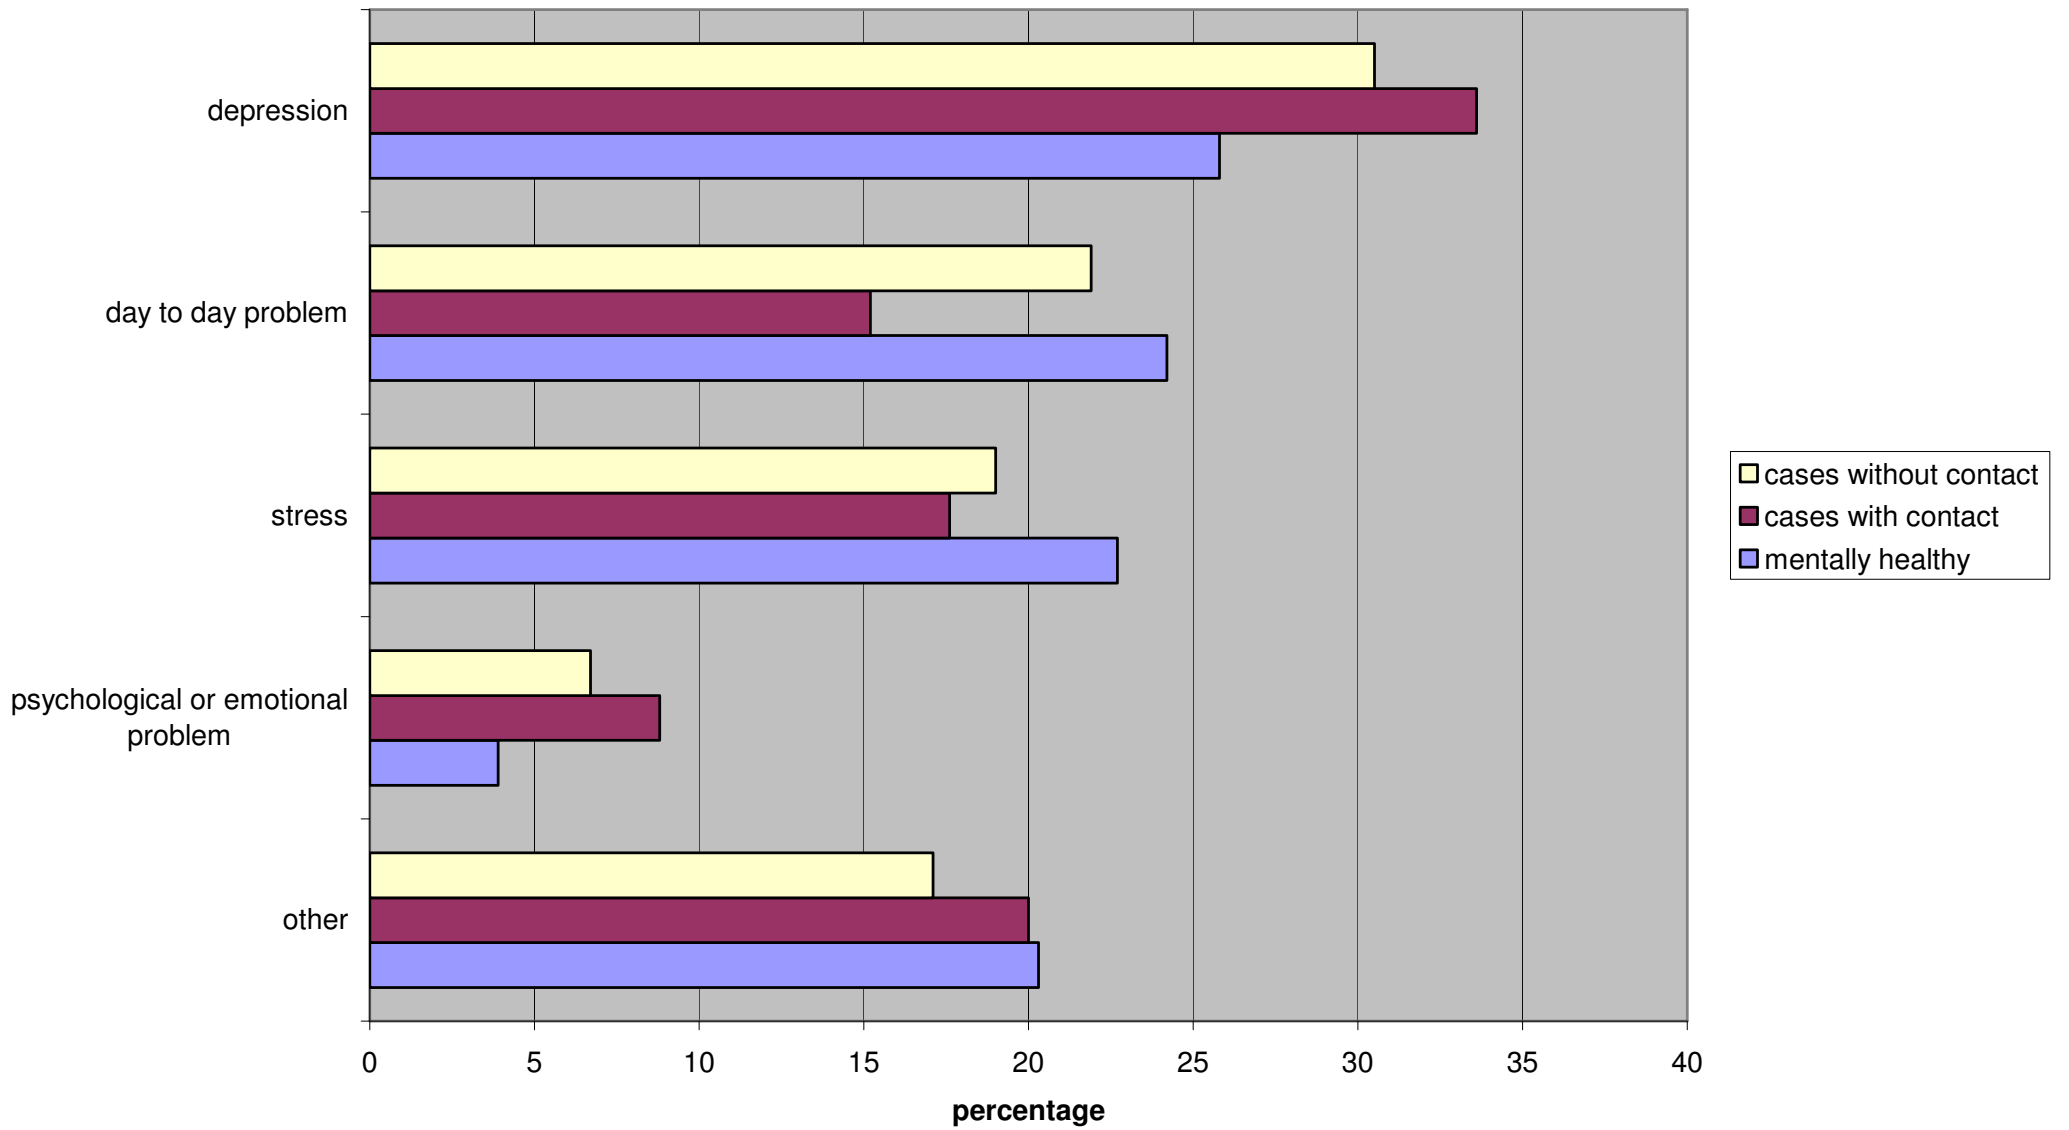

Supplement: 12889_2007_978_MOESM1_ESM.pdf [file 12889_2007_978_MOESM1_ESM.pdf]
